# Supplementary material for: CO2 hydrogenation into formate and methyl formate using Ru molecular catalysts supported on NNN pincer porous organic polymers
Source: Royal Society of Chemistry journal article supplement (doi:10.1039/d0qi01123a), 2020-11-10

Supporting Information

# CO<sub>2</sub> hydrogenation into formate and methyl formate using Ru molecular catalysts supported on NNN pincer porous organic polymers

Hongjin Park<sup>†a</sup>, Kwangho Park<sup>†b</sup>, Kwang-Deog Jung<sup>b</sup>, and Sungho Yoon<sup>\*a</sup>

---

<sup>a</sup> Department of Chemistry, Chung Ang University, 84 Heukseok-ro, Dongjak-gu, Seoul, Republic of Korea

<sup>b</sup> Clean Energy Research Centre, Korea Institute of Science and Technology

---

P.O. Box 131, Cheongryang, Seoul (Republic of Korea)

## Contents

Table S1. Comparison of activity with catalysts reported in literature

Table S2. Porosity parameters of materials by BET analysis

Table S3. Remaining of Ru amount of fresh and used catalyst

Table S4. Leaching Ru content of every cycle

Figure S1. Electron dispersive X-ray spectroscopy (EDX) of supports (3-bpp-POP and N-Me-bpp-POP)

Figure S2. FT-IR spectrum of 3-bpp monomer and N-Me-bpp monomer

Figure S3. Electron dispersive X-ray spectroscopy (EDX) of catalysts (Ru/3-bpp-POP and N-Me-3-bpp-POP)

Figure S4. X-ray photoelectron spectroscopy (XPS) of catalysts (Ru 3d<sub>3/2</sub> and 3d<sub>1/2</sub> peaks of Ru/3-bpp-POP)

Figure S5. X-ray photoelectron spectroscopy (XPS) of catalysts (Ru 3d<sub>3/2</sub> and 3d<sub>1/2</sub> peaks of Ru/N-Me-3-bpp-POP)

Figure S6. MASS spectra of 3-bpp and N-Me-3-bpp monomer

Figure S7. TGA of 3-bpp-POP and N-Me-bpp-POP

Figure S8. Performing GC analysis for detecting of CO

Table S1. Comparison of activity with catalysts reported in literature

| Catalyst                          | Temperature (°C) | Time (h) | Pressure (bar) | TON of MF | TOF (h <sup>-1</sup> ) | ref  |
|-----------------------------------|------------------|----------|----------------|-----------|------------------------|------|
| Cu/ZnO/alumina                    | 150              | 25       | 60             | 771.25    | 30.85                  | S1   |
| 1 % Ru-Cu/AnO/alumina             | 150              | 25       | 60             | 840.5     | 33.62                  | S1   |
| 1 % Ni-Cu/ZnO/alumina             | 150              | 25       | 60             | 931.75    | 37.27                  | S1   |
| 1 % Au-Cu/ZnO/alumina             | 150              | 25       | 60             | 335.5     | 13.42                  | S1   |
| 1 % Pd-Cu/ZnO/alumina             | 150              | 25       | 60             | 953.75    | 38.15                  | S1   |
| Au-ZrO <sub>2</sub> -9.0          | 200              | 1        | 80             | 534       | 534                    | S2   |
| Au/Al <sub>2</sub> O <sub>3</sub> | 70               | 9.22     | 40             | 1088      | 118                    | S3   |
| Au/Al <sub>2</sub> O <sub>3</sub> | 100              | 1.24     | 40             | 118       | 95                     | S3   |
| 1 wt% Ru@pDPPE                    | 160              | 1        | 80             | 1079      | 1079                   | S4   |
| 1 wt% Ru/N-Me-3-bpp-POP           | 160              | 2        | 80             | 1726      | 863                    | this |

Ref S1: Journal of the American Chemical Society 129. (2007), 6346-6662 DOI: <https://doi.org/10.1021/ja0706302>

Ref S2: Green Chemistry 17, (2015), 1467-1472 DOI: <https://doi.org/10.1039/C4GC01818D>

Ref S3: Journal of CO<sub>2</sub> utilization 17, (2017), 273-283 DOI: <https://doi.org/10.1016/j.jcou.2016.11.016>

Ref S4: ChemSusChem 12, (2019), 3278-3285 DOI: <https://doi.org/10.1002/cssc.201900808>

Table S2. Porosity parameters of materials by BET analysis

| Material          | BET plot                |                                                         |                                                       |        |                                                      |                         |
|-------------------|-------------------------|---------------------------------------------------------|-------------------------------------------------------|--------|------------------------------------------------------|-------------------------|
|                   | Correlation coefficient | V <sub>m</sub> [cm <sup>3</sup> (STP) g <sup>-1</sup> ] | a <sub>s, BET</sub> [m <sup>2</sup> g <sup>-1</sup> ] | C      | Total pore volume [cm <sup>3</sup> g <sup>-1</sup> ] | Mean pore diameter [nm] |
| 3-bpp-POP         | 1                       | 129.72                                                  | 564.59                                                | 787.53 | 0.2926                                               | 2.0731                  |
| Ru/3-bpp-POP      | 1                       | 140.95                                                  | 613.47                                                | 735.72 | 0.3152                                               | 2.0553                  |
| N-Me-3-bpp-POP    | 1                       | 127.87                                                  | 556.54                                                | 265.54 | 0.2901                                               | 2.167                   |
| Ru/N-Me-3-bpp-POP | 1                       | 137.44                                                  | 598.19                                                | 213.59 | 0.3041                                               | 2.0335                  |

Table S3. Remaining of Ru amount of fresh and used catalyst

| Sample                                              | Ru / wt % |
|-----------------------------------------------------|-----------|
| Fresh N-Me-3-bpp-POP                                | 1.1       |
| Spent N-Me-3-bpp-POP<br>(after 5 <sup>th</sup> run) | 0.62      |

Table S4. Leaching Ru content of every cycle<sup>a</sup>

| Filtrate            | Filtrate vol. (mL) | Ru conc. (mg/L) | Leached Ru (wt %) |
|---------------------|--------------------|-----------------|-------------------|
| 1 <sup>st</sup> run | 33.3               | 2.53            | 0.421             |
| 2 <sup>nd</sup> run | 44                 | 0.26            | 0.057             |
| 3 <sup>rd</sup> run | 32.8               | 0.15            | 0.025             |
| 4 <sup>th</sup> run | 32.5               | 0.12            | 0.020             |
| 5 <sup>th</sup> run | 32.3               | 0.05            | 0.008             |

<sup>a</sup>determined by ICP-OES,

Figure S1. Electron dispersive X-ray spectroscopy (EDX) of supports (3-bpp-POP and N-Me-bpp-POP)

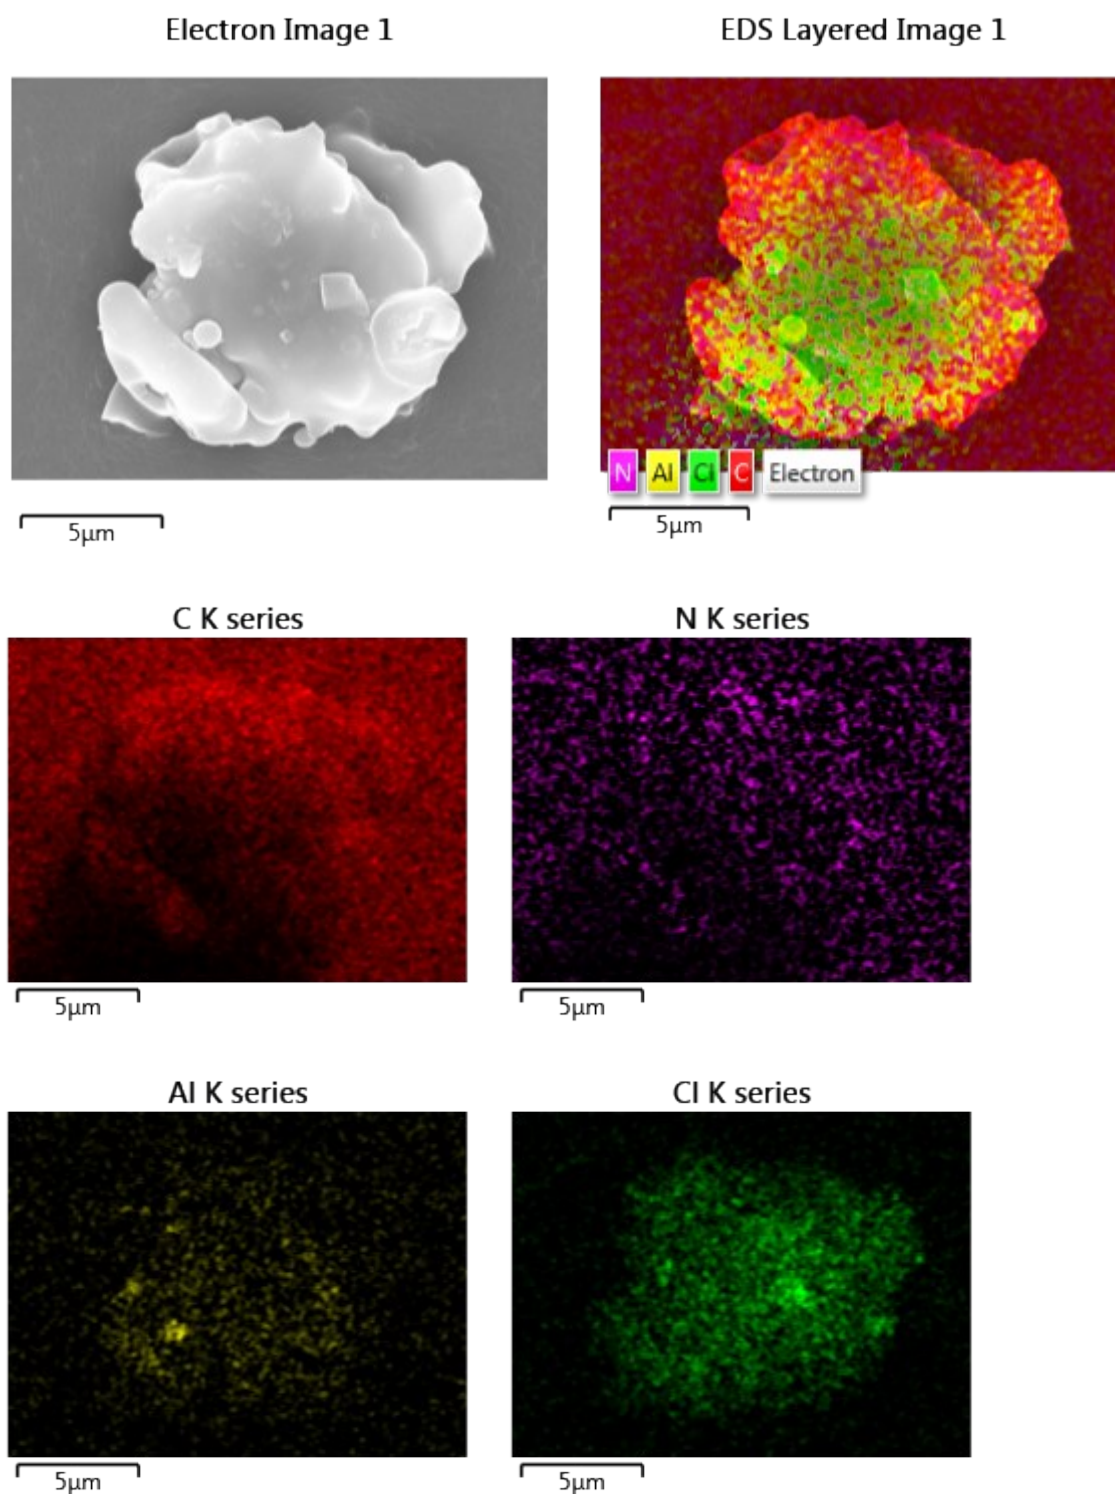

Figure S1, a, EDX of 3-bpp-POP

Electron Image 2

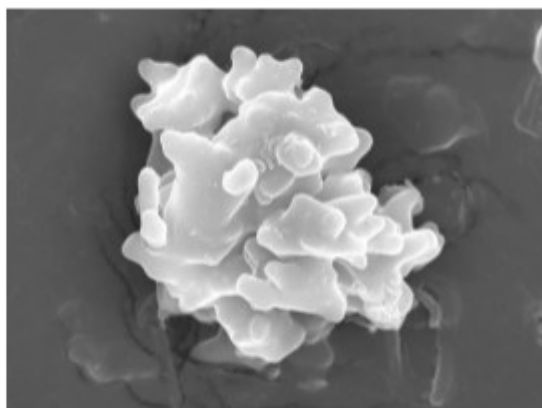

10µm

EDS Layered Image 2

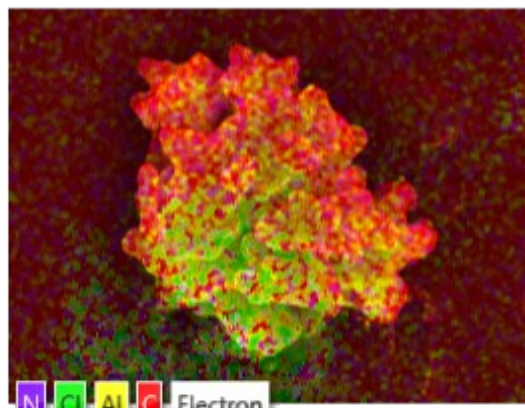

10µm

C K series

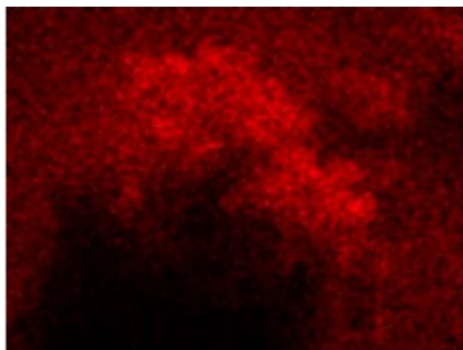

10µm

N K series

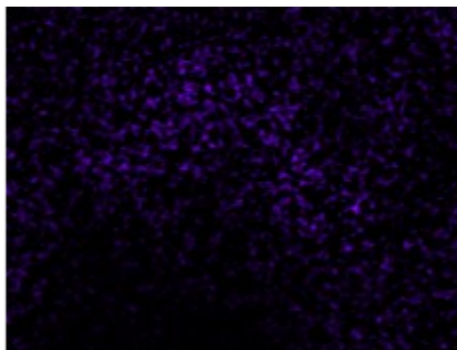

10µm

Al K series

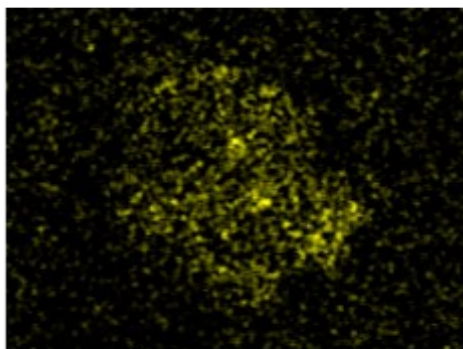

10µm

Cl K series

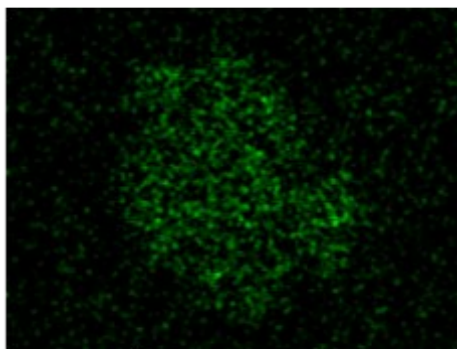

10µm

Figure S1, b, EDX of N-Me-3-bpp-POP

Figure S2. FT-IR spectrum of 3-bpp monomer and N-Me-bpp monomer

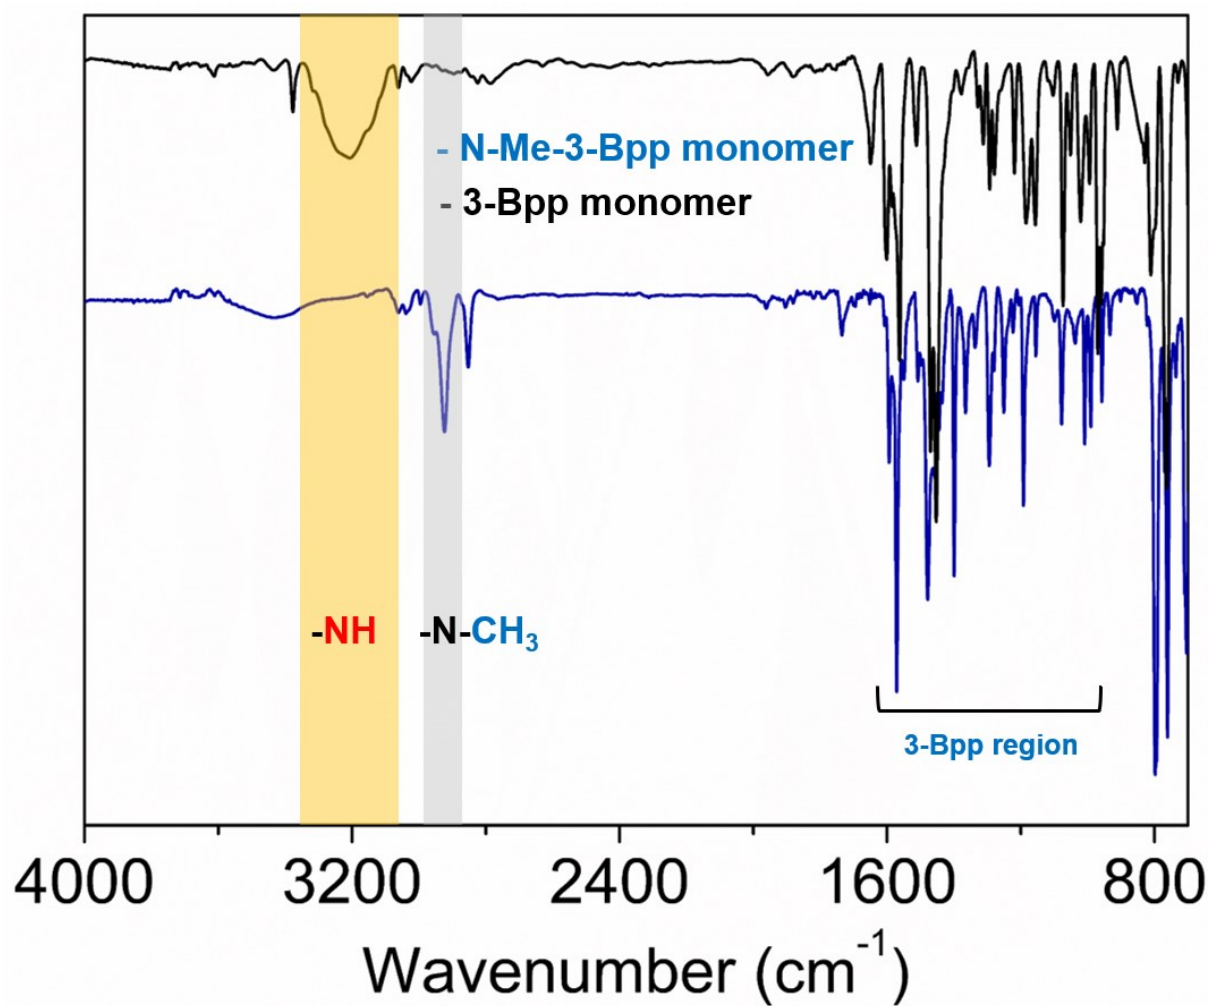

Figure S3. Electron dispersive X-ray spectroscopy (EDX) of catalysts (Ru/3-bpp-POP and N-Me-3-bpp-POP)

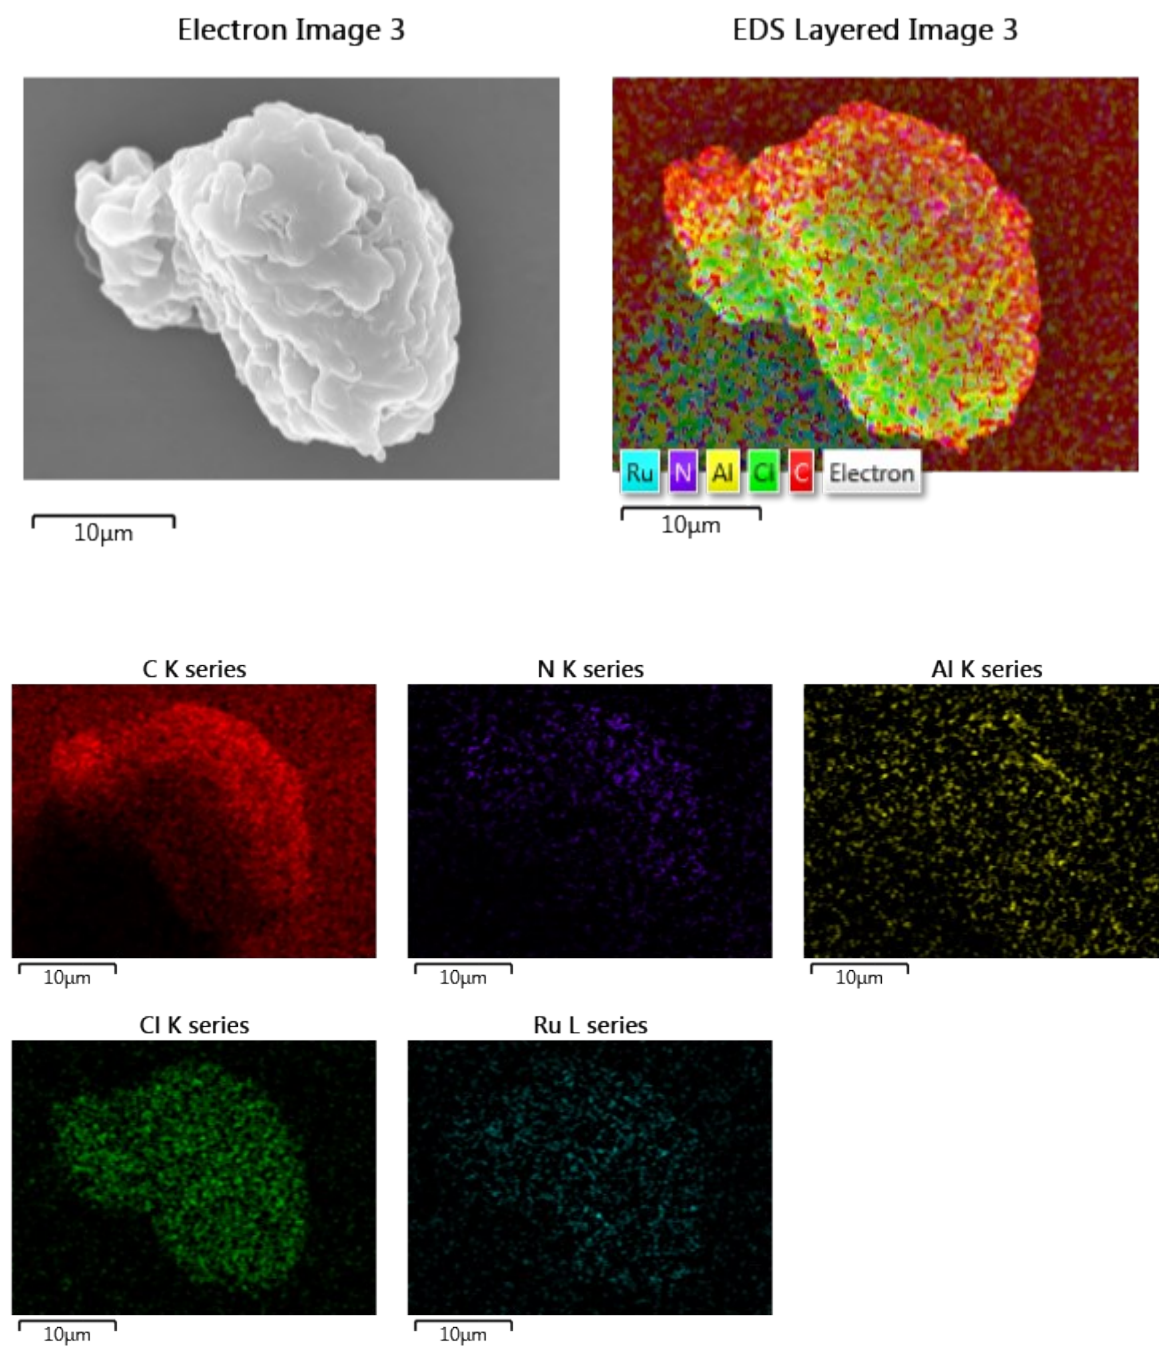

Figure S3, a, EDX of Ru/3-bpp-POP

Electron Image 4

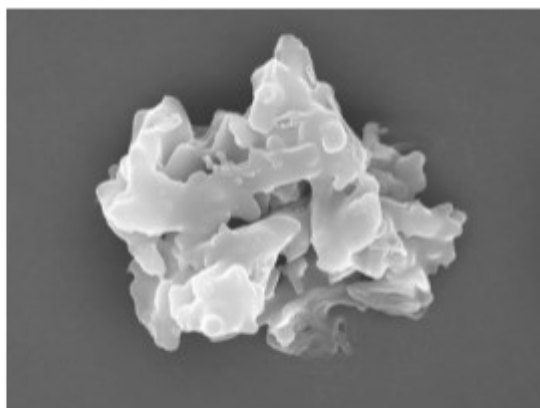

10μm

EDS Layered Image 4

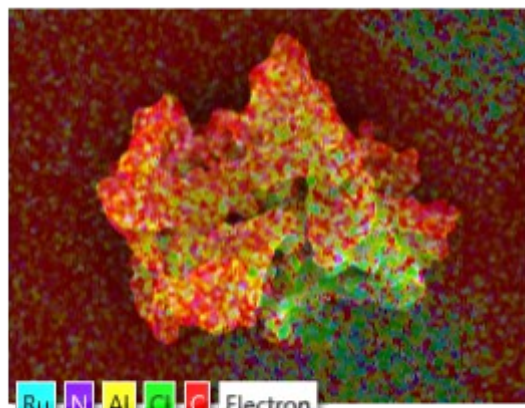

10μm

C K series

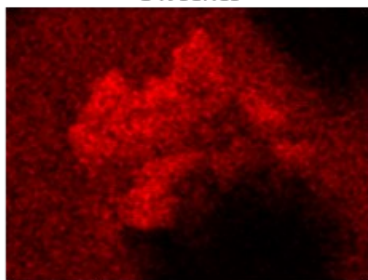

10μm

N K series

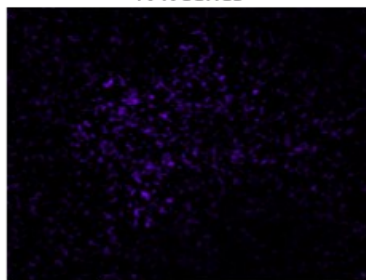

10μm

Al K series

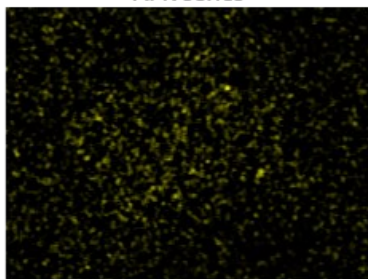

10μm

Cl K series

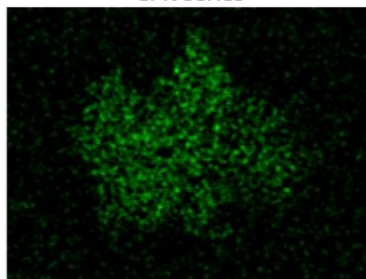

10μm

Ru L series

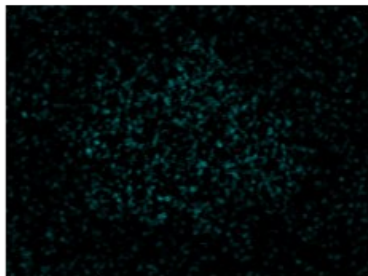

10μm

Figure S3, b, EDX of Ru/3-Me-bpp-POP



Figure S4. X-ray photoelectron spectroscopy (XPS) of catalysts (Ru 3d<sub>3/2</sub> and 3d<sub>1/2</sub> peaks of Ru/3-bpp-POP

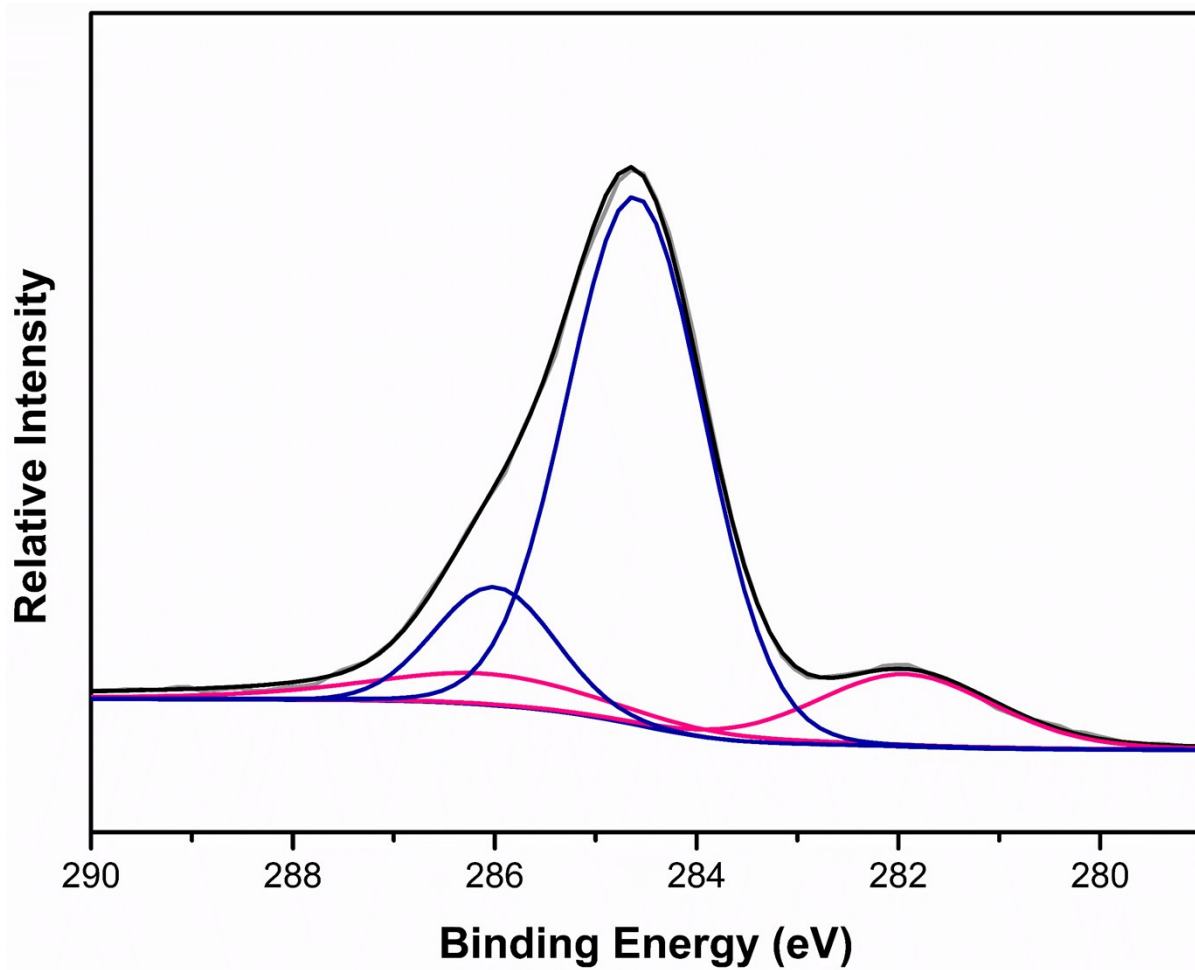

Figure S5. X-ray photoelectron spectroscopy (XPS) of catalysts (Ru 3d<sub>3/2</sub> and 3d<sub>1/2</sub> peaks of Ru/N-Me-3-bpp-POP

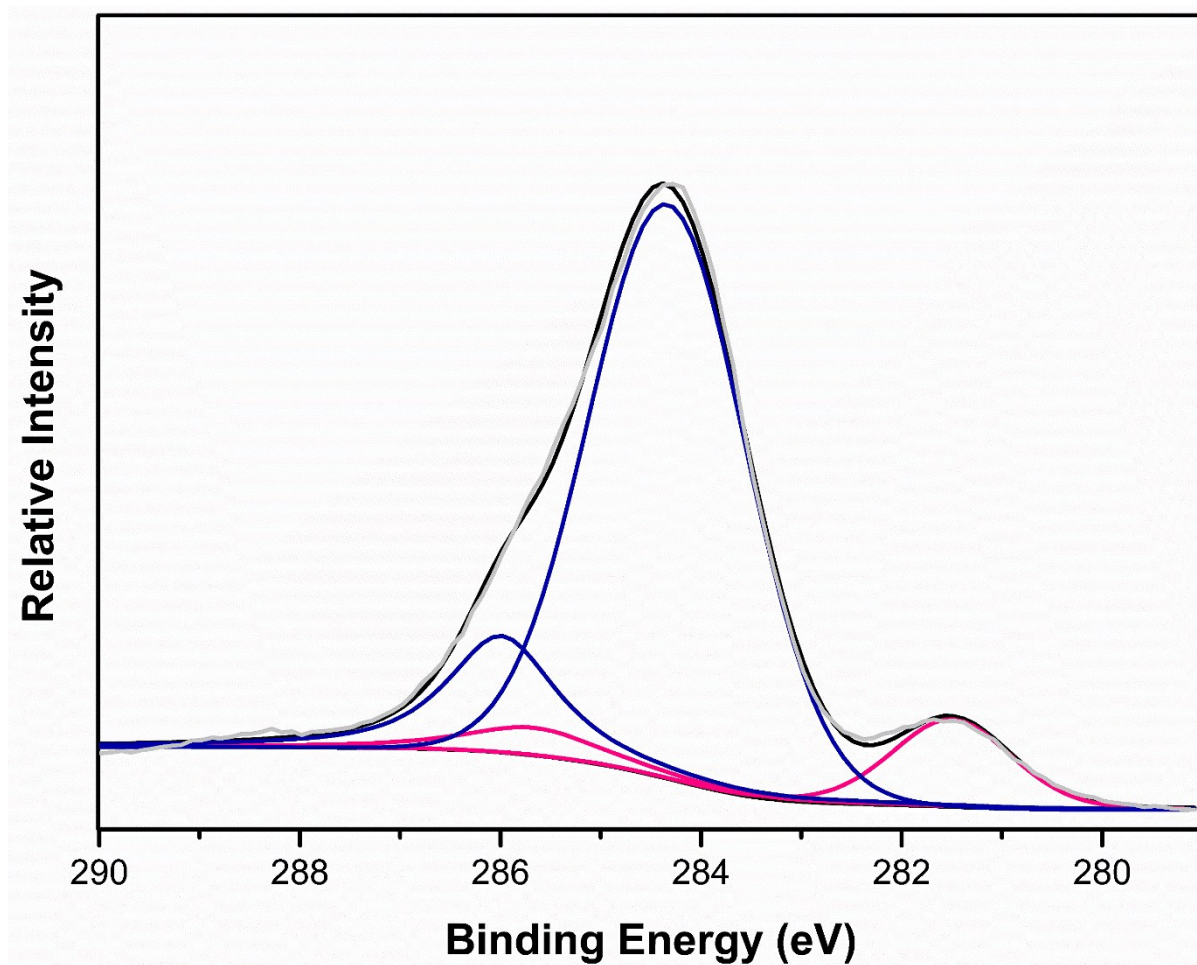

Figure S6. MASS spectra of 3-bpp and N-Me-3-bpp monomer

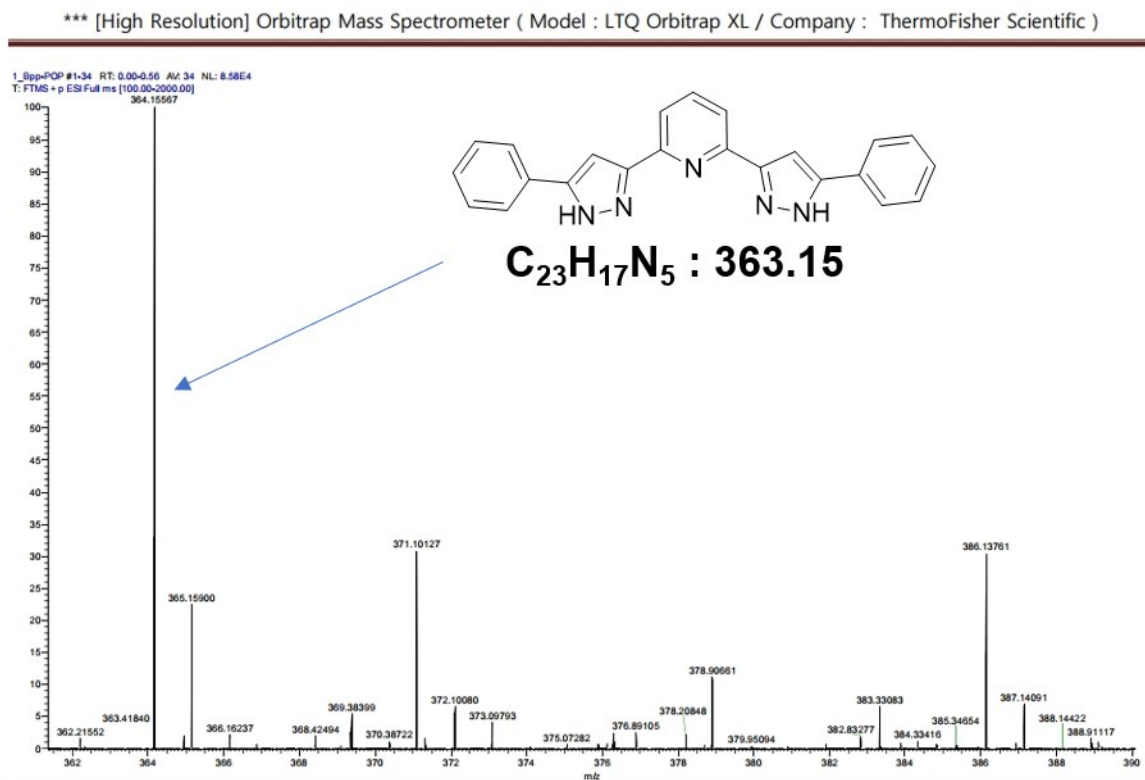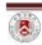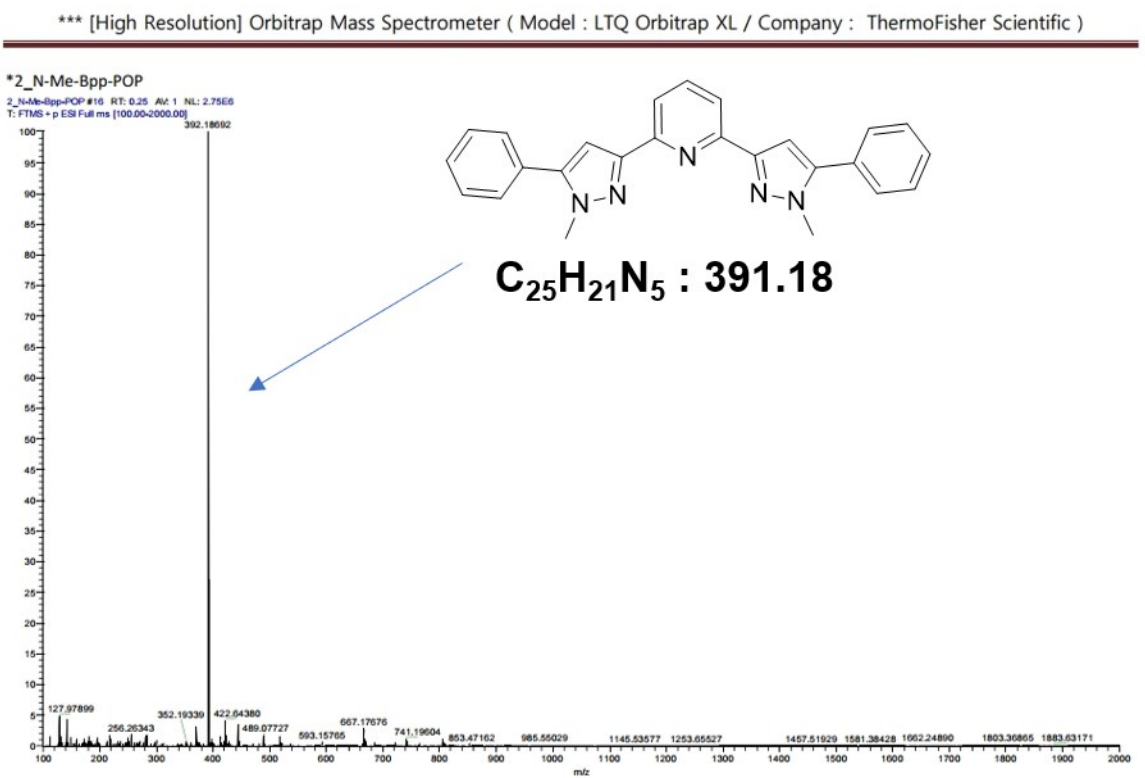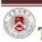

Figure S7. TGA of 3-bpp-POP and N-Me-bpp-POP

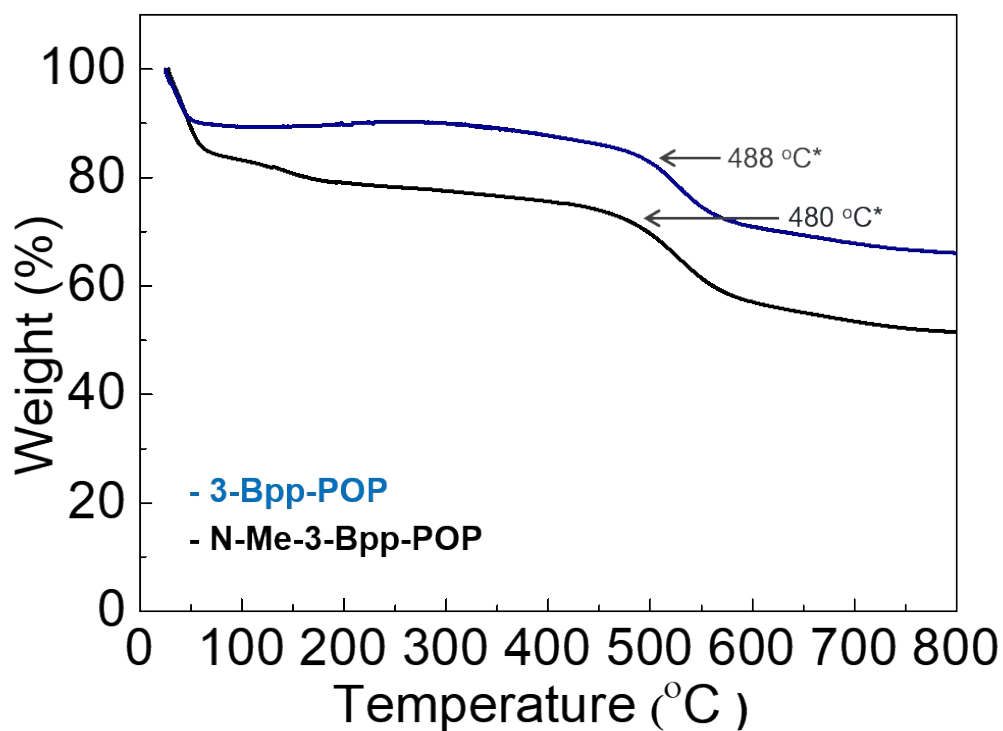

Figure S8. Performing GC analysis for detecting of CO

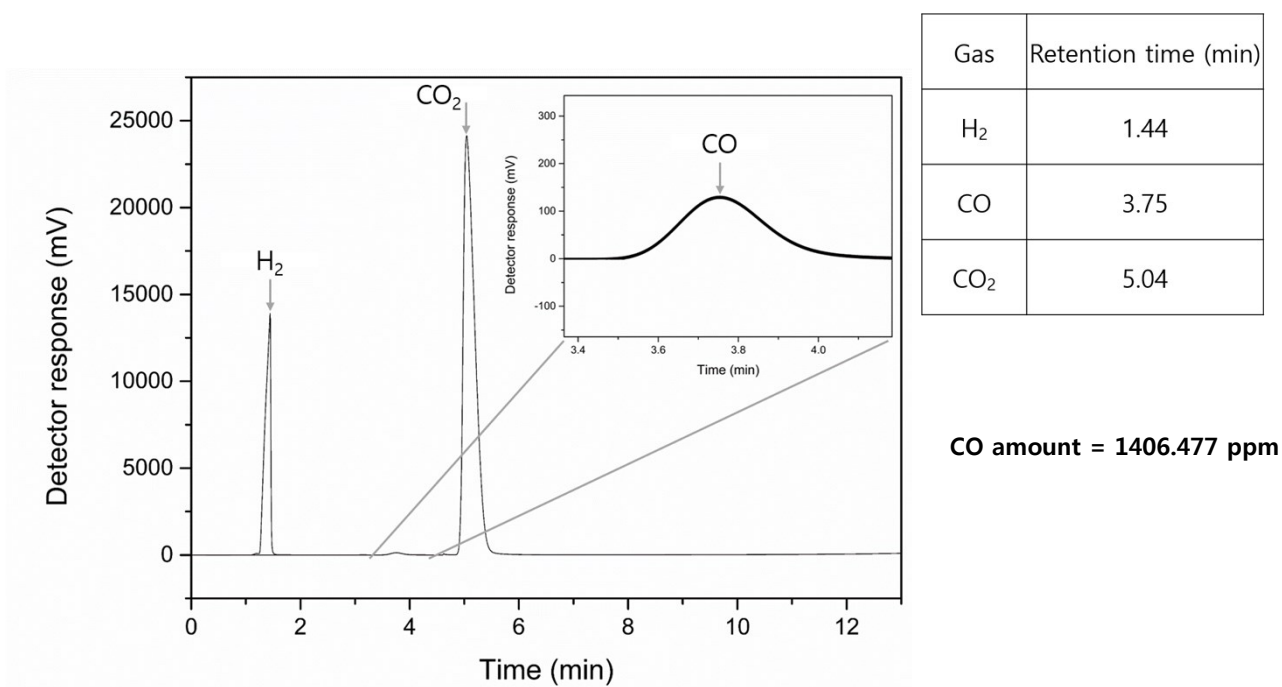

Supplement: d0qi01123a1.pdf [file d0qi01123a1.pdf]
